# Supplementary material for: The Full Globin Repertoire of Turtles Provides Insights into Vertebrate Globin Evolution and Functions
Source: PubMed Central journal article supplement (PMC4524481; doi:10.1093/gbe/evv114), 2015-05-15
Supplement: supp_evv114_Supplementary_tables.pdf [file supp_evv114_Supplementary_tables.pdf]

**Supplementary table S1.** Oligonucleotides used for RT-PCR, qPCR, RACE-PCR and ISH.

| <b>Gene</b>        | <b>Label</b>      | <b>5'-3'sequence</b>               |
|--------------------|-------------------|------------------------------------|
| <b>Myoglobin</b>   | Cpi_Mb_for        | TCTGGGCGAAAGTGGAAC                 |
|                    | Cpi_Mb_rev        | ACCGAACTCCTTGTACTTGC               |
|                    | Cpi_Mb_qPCR_for   | ATAATCAGACTCTTTCAGGTTTCATCCCGAGACC |
|                    | Cpi_Mb_qPCR_rev   | TGGTGCCGTGTTTCTTCACTTCTTTCG        |
|                    | Psi_Mb_for        | GGAAGTTATGATCAGGCTCTTTCAGGTTAC     |
|                    | Psi_Mb_rev        | TTCATCTGAGCTCTTCATCTCATCCGCC       |
| <b>Neuroglobin</b> | Cpi_Ngb_for       | GATTATCCAGCACACAACAGGC             |
|                    | Cpi_Ngb_rev       | GCTTTCACCACGGAACCATAC              |
|                    | Cpi_Ngb_qPCR_for  | GGCATCGTCTTGTTTACCAGGTTGTTTGATC    |
|                    | Cpi_Ngb_qPCR_rev  | GATGAGAGGCACTCCTGAGGGCTG           |
|                    | Psi_Ngb_for       | CCTGGATCACATTAGGAAGGTGATGCTTG      |
|                    | Psi_Ngb_rev       | CCCCAACTGCCTGGTGTTCCTTGC           |
|                    | Psi_Ngb_ISH_for   | ATGGAGAGTGGAAGATTATCCAGC           |
|                    | Psi_Ngb_ISH_rev   | CTATTCCCCTCTTTACGTGCA              |
| <b>Cytoglobin</b>  | Cpi_Cygb_for      | TTGAGAGATGGGAAAGGAGCG              |
|                    | Cpi_Cygb_rev      | GGTGTAGATGAGGCTCTTC                |
|                    | Cpi_Cygb_qPCR_for | ACTCCGAAAAGGTCTCATCTGTTTTGGC       |
|                    | Cpi_Cygb_qPCR_rev | GGTGAAGAACTTGAAGTAGACAGGCTCCA      |
|                    | Psi_Cygb_for      | CACCGTAGTGGAGAACATCAATGACTCC       |
|                    | Psi_Cygb_rev      | GCCGGTGAAGAACTTGAAGTAGACAGG        |
| <b>Globin E</b>    | Cpi_GbE_for       | CCTGGGAGAAGATGTATGCC               |
|                    | Cpi_GbE_rev       | GCAGATTTTCGTTGGTCACTT              |
|                    | Cpi_GbE_qPCR_for  | ACTGATGCTTTCCTTGGGATTGTGAACC       |
|                    | Cpi_GbE_qPCR_rev  | TCACAGATTATCCTAAAGTTCTTGGGGTCAACC  |
|                    | Psi_GbE_for       | CTGTGCTGGTCAAGATGTTTACAGAACACC     |
|                    | Psi_GbE_rev       | CCATGACTCCTGATCTGATCTGACTGTTCC     |

|                   |                      |                                |
|-------------------|----------------------|--------------------------------|
|                   | Psi_GbE_ISH_for      | ATGGCGTTCTCTGAAGCAGAA          |
|                   | Psi_GbE_ISH_rev      | CCAGCCAGCTTCTTTATAGGCA         |
| <b>Globin X</b>   | Cpi_GbX_for          | ATGGGGTGCCTCTGTCTG             |
|                   | Cpi_GbX_rev          | CTGCTCCCTACCTGCCAGG            |
|                   | Cpi_GbX_qPCR_for     | GCCTGAGGGTGATGTCCTTCATTGA      |
|                   | Cpi_GbX_qPCR_rev     | CTTGGGAGGGGCGTTGTATCTGTAG      |
|                   | Psi_GbX_for          | CCTTCATCGAGAAAAGCGTGGCCC       |
|                   | Psi_GbX_rev          | GCCAACGTAATCATAGTACTTGGGAGG    |
| <b>Globin Y</b>   | Cpi_GbY_for          | CACATCTGGGCAAAGTTATT           |
|                   | Cpi_GbY_rev          | G TTCAGAGAGCAGACCAAA           |
|                   | Cpi_GbY_qPCR_for     | TGAATTTCCAGAGCATGTTTCAGGTGATCC |
|                   | Cpi_GbY_qPCR_rev     | CAGACCAAAGAGCTTCTCCCAGGAG      |
|                   | Psi_GbY_for          | GCATACTTCAAGAGCATCCCGACTGAAGG  |
|                   | Psi_GbY_rev          | CAACCATGACTCTCCGCCCATGG        |
| <b>Hemoglobin</b> | Psi_HbK_5'rev        | CAGGTTGTAGGCATGCAGGTCG         |
|                   | Psi_HbK_5'rev_nested | CGTCTTGCTGAGGGTGTCCATGTG       |
|                   | Psi_HbA_3'for        | CCACCAAGACCTACTTCGCC           |
|                   | Psi_HbA_3'for_nested | GGCAAGAAGGTGCTGAGCG            |

**Supplementary table S2.** Globin genes of the Chinese softshell turtle.

| <b>Globin genes</b> | <b>Accession number</b>                        | <b>Length<br/>(aa)/exons</b> | <b>Genomic location</b>                                                                                                                                                |
|---------------------|------------------------------------------------|------------------------------|------------------------------------------------------------------------------------------------------------------------------------------------------------------------|
| Adgb                | XM_006111304.1                                 | 1450/31                      | JH205385: 482872 - 698835                                                                                                                                              |
| Ngb                 | XM_006117796.1                                 | 160/4                        | JH207292: 8582005-8577248                                                                                                                                              |
| GbX                 | not annotated                                  | 218/5                        | JH211032: 890205-873421                                                                                                                                                |
| Cygb                | XM_006136486.1                                 | 179/3                        | JH212636:3508930-3478787                                                                                                                                               |
| Mb                  | ENSPSIG00000008494                             | 154/3                        | JH224648: 224623-229563                                                                                                                                                |
| GbE                 | XM_006127809                                   | 151/3                        | JH209952: 146997- 153094                                                                                                                                               |
| HbZ                 | ENSPSIG00000012161                             | 142/3                        | JH209131: 354922-352105                                                                                                                                                |
| HbK                 | ENSPSIG00000012157,<br>not correctly annotated | 141/3                        | JH209131: 342037-345748 (1 <sup>st</sup> + 2 <sup>nd</sup><br>exon), sequence was completed by RACE.                                                                   |
| HbA                 | ENSPSIG00000011874;<br>ENSPSIG00000011856      | 142/3                        | JH209131: 336263-337115 (1 <sup>st</sup> + 2 <sup>nd</sup><br>exon); 329346-330180 (1 <sup>st</sup> + 2 <sup>nd</sup> exon),<br>sequences were each completed by RACE. |
| HbB1                | ENSPSIG00000004624                             | 147/3                        | JH210967: 92793-94274                                                                                                                                                  |
| HbB2                | ENSPSIG00000005077                             | 147/3                        | JH210967: 107525-108943                                                                                                                                                |
| GbY                 | XM_006124603.1                                 | 154/3                        | JH209131:310883 - 315182                                                                                                                                               |

**Supplementary table S3.** Globin genes of the western painted turtle.

| <b>Globin genes</b> | <b>Accession number<br/>(GenBank)</b>                            | <b>Length<br/>(aa)/exons</b> | <b>Genomic location (ENSEMBLE)</b>                                               |
|---------------------|------------------------------------------------------------------|------------------------------|----------------------------------------------------------------------------------|
| Adgb                | XM_005280422.1                                                   | 1596/38                      | Chr 3: 42171821- 42391301<br>[Chrysemys_picta_bellii-3.0.3<br>(GCF_000241765.3)] |
|                     | XM_005280423.1                                                   |                              |                                                                                  |
|                     | XM_005280424.1                                                   |                              |                                                                                  |
|                     | XM_005280425.1                                                   |                              |                                                                                  |
|                     | XM_005280426.1                                                   |                              |                                                                                  |
| Ngb                 | XM_005301643.2                                                   | 160/4                        | JH584728: 4213166- 4208484                                                       |
| GbX                 | XM_005293187.1                                                   | 222/5                        | JH584610:1442038- 1451887                                                        |
| Cygb                | XM_005297540.2                                                   | 179/3                        | JH584685: 4299504- 4270945                                                       |
| Mb                  | XM_005300826.2                                                   | 154/3                        | JH584171: 6110702- 6094271                                                       |
| GbE                 | XM_005293060.2                                                   | 151/3                        | JH584608 :826847- 830855                                                         |
| HbZ                 | XM_005306148.1,<br>XM_008162535.1<br>(transcripts are identical) | 142/3                        | JH584800: 1628402- 1631333                                                       |
|                     |                                                                  |                              |                                                                                  |
| HbK                 | XM_005306157.1                                                   | 141/3                        | JH584800: 1638554- 1639378                                                       |
| HbA                 | XM_005306158.1                                                   | 142/3                        | JH584800: 1645419- 1646202                                                       |
| HbB1                | XM_005290010.1                                                   | 147/3                        | JH584561: 1328654- 1326746                                                       |
| HbB2                | XM_005290009.1                                                   | 147/3                        | JH584561: 1316355- 1314155                                                       |
| HbG                 | XM_005290008.1                                                   | 147/3                        | JH584561: 1310563- 1308793                                                       |
| GbY                 | XM_005306194.2                                                   | 154/3                        | JH584800: 1665335- 1660554                                                       |

**Supplementary table S4.** Identities and similarities of the turtle globin proteins, and their orthologs in the chicken.

| Identity [%]/<br>Similarity [%] |         | Western painted turtle |               |               |               |               |               |               |               |               |               |               |               |               | Chicken       |
|---------------------------------|---------|------------------------|---------------|---------------|---------------|---------------|---------------|---------------|---------------|---------------|---------------|---------------|---------------|---------------|---------------|
|                                 |         | HbZ                    | HbK           | HbA           | HbB1          | HbB2          | HbG           | Mb            | Ngb           | Cygb          | GbE           | GbY           | GbX           | Adgb          |               |
| Chinese softshell turtle        | HbZ     | 91.5/<br>94.4          |               |               |               |               |               |               |               |               |               |               |               |               | 81.7/<br>88.0 |
|                                 | HbK     |                        | 82.3/<br>89.4 |               |               |               |               |               |               |               |               |               |               |               | 68.8/<br>83.0 |
|                                 | HbA     |                        |               | 76.1/<br>86.6 |               |               |               |               |               |               |               |               |               |               | 69.0/<br>82.4 |
|                                 | HbB1    |                        |               |               | 90.5/<br>98.0 |               |               |               |               |               |               |               |               |               | 85.0/<br>93.9 |
|                                 | HbB2    |                        |               |               |               | 81.0/<br>89.1 | -             |               |               |               |               |               |               |               | 75.5/<br>86.4 |
|                                 | Mb      |                        |               |               |               |               |               | 88.3/<br>92.9 |               |               |               |               |               |               | 76.6/<br>84.4 |
|                                 | Ngb     |                        |               |               |               |               |               |               | 92.5/<br>96.9 |               |               |               |               |               | 76.2/<br>88.8 |
|                                 | Cygb    |                        |               |               |               |               |               |               |               | 97.8/<br>98.9 |               |               |               |               | 84.4/<br>91.6 |
|                                 | GbE     |                        |               |               |               |               |               |               |               |               | 96.0/<br>98.7 |               |               |               | 85.4/<br>94.0 |
|                                 | GbY     |                        |               |               |               |               |               |               |               |               |               | 80.5/<br>91.6 |               |               | -             |
|                                 | GbX     |                        |               |               |               |               |               |               |               |               |               |               | 82.0/<br>90.1 |               | -             |
|                                 | Adgb    |                        |               |               |               |               |               |               |               |               |               |               |               | 88.3/<br>92.6 | 62.9/<br>74.9 |
|                                 | Chicken |                        | 83.1/<br>90.1 | 72.3/<br>86.5 | 76.1/<br>83.1 | 88.4/<br>96.0 | 80.3/<br>91.8 | -             | 75.3/<br>85.7 | 78.1/<br>88.8 | 84.9/<br>92.2 | 85.4/<br>92.7 | -             | -             | 64.6/<br>76.7 |

**Supplementary table S5.** List of globin sequences used for phylogenetic analyses (fig. 3 and Supplementary fig. S1). EMBL/GenBank/ENSEMBL accession numbers of nucleotides are given. Asterisks denote protein accession numbers.

| <b>Globin</b> | <b>Label</b>             | <b>Species</b>                   | <b>Common name</b>       | <b>Accession number</b>    |
|---------------|--------------------------|----------------------------------|--------------------------|----------------------------|
| GbX           | goldfish GbX             | <i>Carassius auratus</i>         | goldfish                 | AJ635195                   |
| GbX           | painted turtle GbX       | <i>Chrysemis picta bellii</i>    | western painted turtle   | XM_005293187 + genome data |
| GbX           | zebrafish GbX            | <i>Danio rerio</i>               | zebrafish                | AJ635194                   |
| GbX           | catfish GbX              | <i>Ictalurus punctatus</i>       | channel catfish          | CK416201                   |
| GbX           | coelacanth GbX1          | <i>Latimeria chalumnae</i>       | coelacanth               | ENSLACG00000010727         |
| GbX           | coelacanth GbX2          | <i>Latimeria chalumnae</i>       | coelacanth               | ENSLACG00000003954         |
| GbX           | Arctic lamprey GbX1      | <i>Lethenteron camtschaticum</i> | Arctic lamprey           | genome data                |
| GbX           | softshell turtle GbX     | <i>Pelodiscus sinensis</i>       | Chinese softshell turtle | genome data                |
| GbX           | sea lamprey GbX1         | <i>Petromyzon marinus</i>        | sea lamprey              | ENSPMAG00000007241         |
| GbX           | green spotted puffer GbX | <i>Tetraodon nigroviridis</i>    | green spotted puffer     | AJ635193                   |
| GbX           | western clawed frog GbX  | <i>Xenopus tropicalis</i>        | western clawed frog      | NM_001011196               |
| Ngb           | painted turtle Ngb       | <i>Chrysemis picta bellii</i>    | western painted turtle   | XM_005301643               |
| Ngb           | zebrafish Ngb            | <i>Danio rerio</i>               | zebrafish                | BC059416                   |
| Ngb           | chicken Ngb              | <i>Gallus gallus</i>             | chicken                  | NM_001031551               |
| Ngb           | human NGB                | <i>Homo sapiens</i>              | man                      | AB463927                   |
| Ngb           | coelacanth Ngb           | <i>Latimeria chalumnae</i>       | coelacanth               | genome data                |
| Ngb           | mouse Ngb                | <i>Mus musculus</i>              | mouse                    | AJ245945                   |
| Ngb           | platypus Ngb             | <i>Ornithorhynchus anatinus</i>  | platypus                 | XM_001508367               |
| Ngb           | medaka Ngb               | <i>Oryzias latipes</i>           | medaka                   | DK002855                   |
| Ngb           | softshell turtle Ngb     | <i>Pelodiscus sinensis</i>       | Chinese softshell turtle | ENSPSIG00000004493         |
| Ngb           | zebra finch Ngb          | <i>Taeniopygia guttata</i>       | zebra finch              | ENSTGUG00000012286         |
| Ngb           | torafugu Ngb             | <i>Takifugu rubripes</i>         | torafugu                 | XM_003962460               |
| Ngb           | green spotted puffer Ngb | <i>Tetraodon nigroviridis</i>    | green spotted puffer     | AJ315609                   |
| Ngb           | western clawed frog Ngb  | <i>Xenopus tropicalis</i>        | western clawed frog      | NM_001030351               |
| aHb           | inshore hagfish aHb1     | <i>Eptatretus burgeri</i>        | inshore hagfish          | Q7SID0*                    |
| aHb           | river lamprey aHb        | <i>Lampetra fluviatilis</i>      | river lamprey            | P02207*                    |
| aHb           | Arctic lamprey aHb1      | <i>Lethenteron camtschaticum</i> | Arctic lamprey           | AB294236                   |
| aHb           | Arctic lamprey           | <i>Lethenteron</i>               | Arctic lamprey           | genome data                |

|     |                            |                                      |                    |                    |
|-----|----------------------------|--------------------------------------|--------------------|--------------------|
|     | aHb2a                      | <i>camtschaticum</i>                 |                    |                    |
| aHb | Arctic lamprey<br>aHb6     | <i>Lethenteron<br/>camtschaticum</i> | Arctic lamprey     | genome data        |
| aHb | Arctic lamprey<br>aHb7     | <i>Lethenteron<br/>camtschaticum</i> | Arctic lamprey     | AB294237           |
| aHb | Arctic lamprey<br>aHb9     | <i>Lethenteron<br/>camtschaticum</i> | Arctic lamprey     | genome data        |
| aHb | Arctic lamprey<br>aHb10    | <i>Lethenteron<br/>camtschaticum</i> | Arctic lamprey     | genome data        |
| aHb | Arctic lamprey<br>aHb12    | <i>Lethenteron<br/>camtschaticum</i> | Arctic lamprey     | genome data        |
| aHb | Arctic lamprey<br>aHb13    | <i>Lethenteron<br/>camtschaticum</i> | Arctic lamprey     | genome data        |
| aHb | Arctic lamprey<br>aHb14a   | <i>Lethenteron<br/>camtschaticum</i> | Arctic lamprey     | genome data        |
| aHb | Arctic lamprey<br>aHb15    | <i>Lethenteron<br/>camtschaticum</i> | Arctic lamprey     | genome data        |
| aHb | Po brook<br>lamprey aHbA   | <i>Lethenteron zanandreaei</i>       | Po brook lamprey   | Z24746             |
| aHb | Po brook<br>lamprey aHbB   | <i>Lethenteron zanandreaei</i>       | Po brook lamprey   | Z24747             |
| aHb | Po brook<br>lamprey aHbC   | <i>Lethenteron zanandreaei</i>       | Po brook lamprey   | Z24748             |
| aHb | Australian<br>lamprey aHb1 | <i>Mordacia mordax</i>               | Australian lamprey | P21197*            |
| aHb | Australian<br>lamprey aHb2 | <i>Mordacia mordax</i>               | Australian lamprey | P21198*            |
| aHb | Australian<br>lamprey aHb3 | <i>Mordacia mordax</i>               | Australian lamprey | P21199*            |
| aHb | Atlantic hagfish<br>aHb1   | <i>Myxine glutinosa</i>              | Atlantic hagfish   | AF184239           |
| aHb | Atlantic hagfish<br>aHb2   | <i>Myxine glutinosa</i>              | Atlantic hagfish   | AF157494           |
| aHb | Atlantic hagfish<br>aHb3   | <i>Myxine glutinosa</i>              | Atlantic hagfish   | AF184047           |
| aHb | Atlantic hagfish<br>aHb4   | <i>Myxine glutinosa</i>              | Atlantic hagfish   | AF156936           |
| aHb | sea lamprey<br>aHb1        | <i>Petromyzon marinus</i>            | sea lamprey        | P09967*            |
| aHb | sea lamprey<br>aHb2a       | <i>Petromyzon marinus</i>            | sea lamprey        | Q9I9I3*            |
| aHb | sea lamprey<br>aHb3        | <i>Petromyzon marinus</i>            | sea lamprey        | P09968*            |
| aHb | sea lamprey<br>aHb5a       | <i>Petromyzon marinus</i>            | sea lamprey        | P02208*            |
| aHb | sea lamprey<br>aHb5b       | <i>Petromyzon marinus</i>            | sea lamprey        | ENSPMAG00000005354 |
| aHb | sea lamprey<br>aHb6        | <i>Petromyzon marinus</i>            | sea lamprey        | EG333697           |

|      |                                |                                      |                             |                                |
|------|--------------------------------|--------------------------------------|-----------------------------|--------------------------------|
| aHb  | sea lamprey<br>aHb7            | <i>Petromyzon marinus</i>            | sea lamprey                 | EE278870                       |
| aHb  | sea lamprey<br>aHb8            | <i>Petromyzon marinus</i>            | sea lamprey                 | ENSPMAG00000005367             |
| aHb  | sea lamprey<br>aHb9            | <i>Petromyzon marinus</i>            | sea lamprey                 | ENSPMAG00000008540             |
| aHb  | sea lamprey<br>aHb10           | <i>Petromyzon marinus</i>            | sea lamprey                 | FD718926                       |
| aHb  | sea lamprey<br>aHb11           | <i>Petromyzon marinus</i>            | sea lamprey                 | ENSPMAG00000001592             |
| aHb  | sea lamprey<br>aHb12           | <i>Petromyzon marinus</i>            | sea lamprey                 | Scaffold GL477423              |
| aHb  | sea lamprey<br>aHb13           | <i>Petromyzon marinus</i>            | sea lamprey                 | Scaffold GL477423              |
| aHb  | sea lamprey<br>aHb14           | <i>Petromyzon marinus</i>            | sea lamprey                 | Scaffold GL477423              |
| aHb  | sea lamprey<br>aHb1 ps         | <i>Petromyzon marinus</i>            | sea lamprey                 | Scaffold GL476413              |
| aHb  | sea lamprey<br>aHb2 ps         | <i>Petromyzon marinus</i>            | sea lamprey                 | Scaffold GL480013              |
| aMb  | Arctic lamprey<br>aMb1         | <i>Lethenteron<br/>camtschaticum</i> | Arctic lamprey              | genome data                    |
| aMb  | sea lamprey<br>aMb1            | <i>Petromyzon marinus</i>            | sea lamprey                 | ENSPMAG00000006056             |
| aMb  | sea lamprey<br>aMb2            | <i>Petromyzon marinus</i>            | sea lamprey                 | EG021442                       |
| Cygb | painted turtle<br>Cygb         | <i>Chrysemis picta bellii</i>        | western painted<br>turtle   | XM_005297540                   |
| Cygb | zebrafish Cygb1                | <i>Danio rerio</i>                   | zebrafish                   | BC165894                       |
| Cygb | zebrafish Cygb2                | <i>Danio rerio</i>                   | zebrafish                   | AJ635229                       |
| Cygb | chicken Cygb                   | <i>Gallus gallus</i>                 | chicken                     | NM_001008789                   |
| Cygb | human CYGB                     | <i>Homo sapiens</i>                  | man                         | AJ315162                       |
| Cygb | European brook<br>lamprey Cygb | <i>Lampetra planeri</i>              | European brook<br>lamprey   | TBA                            |
| Cygb | coelacanth Cygb                | <i>Latimeria chalumnae</i>           | coelacanth                  | ENSLACG00000014904             |
| Cygb | Arctic lamprey<br>Cygb         | <i>Lethenteron<br/>camtschaticum</i> | Arctic lamprey              | genome data                    |
| Cygb | medaka Cygb1                   | <i>Oryzias latipes</i>               | medaka                      | NM_001104767                   |
| Cygb | medaka Cygb2                   | <i>Oryzias latipes</i>               | medaka                      | NM_001104768                   |
| Cygb | softshell turtle<br>Cygb       | <i>Pelodiscus sinensis</i>           | Chinese softshell<br>turtle | ENSPSIG00000002766             |
| Cygb | sea lamprey<br>Cygb            | <i>Petromyzon marinus</i>            | sea lamprey                 | Scaffold GL478089+<br>GL477469 |
| Cygb | rat Cygb                       | <i>Rattus norvegicus</i>             | rat                         | NM_130744                      |
| Cygb | zebra finch Cygb               | <i>Taeniopygia guttata</i>           | zebra finch                 | XM_002195407                   |
| Cygb | torafugu Cygb1                 | <i>Takifugu rubripes</i>             | torafugu                    | ENSTRUG00000012110             |
| Cygb | torafugu Cygb2                 | <i>Takifugu rubripes</i>             | torafugu                    | ENSTRUG00000008030             |



|      |                            |                                    |                          |                            |
|------|----------------------------|------------------------------------|--------------------------|----------------------------|
| Cygb | green spotted puffer Cygb1 | <i>Tetraodon nigroviridis</i>      | green spotted puffer     | AJ635230                   |
| Cygb | western clawed frog Cygb   | <i>Xenopus tropicalis</i>          | western clawed frog      | NM_001006869               |
| GbY  | green anole GbY            | <i>Anolis carolinensis</i>         | green anole              | ENSACAG00000027586         |
| GbY  | elephant shark GbY         | <i>Callorhinchus milii</i>         | elephant shark           | JK861558                   |
| GbY  | painted turtle GbY         | <i>Chrysemis picta bellii</i>      | western painted turtle   | XM_005306194               |
| GbY  | coelacanth GbY             | <i>Latimeria chalumnae</i>         | coelacanth               | XM_005990799               |
| GbY  | platypus GbY               | <i>Ornithorhynchus anatinus</i>    | platypus                 | AC203513                   |
| GbY  | softshell turtle GbY       | <i>Pelodiscus sinensis</i>         | Chinese softshell turtle | ENSPSIG00000011829         |
| GbY  | African clawed frog GbY    | <i>Xenopus laevis</i>              | African clawed frog      | NM_001095686               |
| GbY  | western clawed frog GbY    | <i>Xenopus tropicalis</i>          | western clawed frog      | XM_002941194               |
| GbE  | mallard GbE                | <i>Anas platyrhynchos</i>          | mallard                  | genome data                |
| GbE  | painted turtle GbE         | <i>Chrysemis picta bellii</i>      | western painted turtle   | XM_005293060 + genome data |
| GbE  | chicken GbE                | <i>Gallus gallus</i>               | chicken                  | NM_001008786               |
| GbE  | coelacanth GbE             | <i>Latimeria chalumnae</i>         | coelacanth               | ENSLACG00000001661         |
| GbE  | turkey GbE                 | <i>Meleagris gallopavo</i>         | turkey                   | XM_003202331               |
| GbE  | softshell turtle GbE       | <i>Pelodiscus sinensis</i>         | Chinese softshell turtle | XM_006124603               |
| GbE  | zebra finch GbE            | <i>Taeniopygia guttata</i>         | zebra finch              | XM_002196350               |
| Mb   | painted turtle Mb          | <i>Chrysemis picta bellii</i>      | western painted turtle   | XM_005300826               |
| Mb   | zebrafish Mb               | <i>Danio rerio</i>                 | zebrafish                | AY337025                   |
| Mb   | tope shark Mb              | <i>Galeorhinus galeus</i>          | tope shark               | P14397*                    |
| Mb   | chicken Mb                 | <i>Gallus gallus</i>               | chicken                  | XM_003202347               |
| Mb   | Port Jackson shark Mb      | <i>Heterodontus portusjacksoni</i> | Port Jackson shark       | P02206*                    |
| Mb   | human MB                   | <i>Homo sapiens</i>                | man                      | NM_203377                  |
| Mb   | coelacanth Mb              | <i>Latimeria chalumnae</i>         | coelacanth               | ENSLACG00000007526         |
| Mb   | gummy shark Mb             | <i>Mustelus antarcticus</i>        | gummy shark              | P14399*                    |
| Mb   | medaka Mb                  | <i>Oryzias latipes</i>             | medaka                   | BJ883657                   |
| Mb   | softshell turtle Mb        | <i>Pelodiscus sinensis</i>         | Chinese softshell turtle | ENSPSIG00000008494         |
| Mb   | sperm whale Mb             | <i>Physeter catodon</i>            | sperm whale              | AB271144                   |
| Mb   | cloudy catshark Mb         | <i>Scyliorhinus torazame</i>       | cloudy catshark          | FY417124                   |
| Mb   | zebra finch Mb             | <i>Taeniopygia guttata</i>         | zebra finch              | XM_002199380               |
| HbA  | painted turtle HbA         | <i>Chrysemis picta bellii</i>      | western painted turtle   | XM_005306158               |

|     |                               |                                        |                             |                                                    |
|-----|-------------------------------|----------------------------------------|-----------------------------|----------------------------------------------------|
| HbA | painted turtle<br>HbK         | <i>Chrysemis picta bellii</i>          | western painted<br>turtle   | XM_005306157                                       |
| HbA | painted turtle<br>HbZ         | <i>Chrysemis picta bellii</i>          | western painted<br>turtle   | XM_005306148                                       |
| HbA | zebrafish HbA                 | <i>Danio rerio</i>                     | zebrafish                   | BC164447                                           |
| HbA | zebrafish HbZ                 | <i>Danio rerio</i>                     | zebrafish                   | AY325264                                           |
| HbA | zebrafish HbAx                | <i>Danio rerio</i>                     | zebrafish                   | AL915033                                           |
| HbA | chicken HbA                   | <i>Gallus gallus</i>                   | chicken                     | NM_001004376                                       |
| HbA | chicken HbK                   | <i>Gallus gallus</i>                   | chicken                     | XM_003643192                                       |
| HbA | Port Jackson<br>shark HbA     | <i>Heterodontus<br/>portusjacksoni</i> | Port Jackson shark          | P02021*                                            |
| HbA | human HbA                     | <i>Homo sapiens</i>                    | man                         | AF105974                                           |
| HbA | human HBZ                     | <i>Homo sapiens</i>                    | man                         | M24173                                             |
| HbA | coelacanth HbA1               | <i>Latimeria chalumnae</i>             | coelacanth                  | ENSLACG00000006283                                 |
| HbA | coelacanth HbA2               | <i>Latimeria chalumnae</i>             | coelacanth                  | P23740*                                            |
| HbA | spotless smooth-<br>hound HbA | <i>Mustelus griseus</i>                | spotless smooth-<br>hound   | Q9YGW2*                                            |
| HbA | medaka HbA                    | <i>Oryzias latipes</i>                 | medaka                      | BAC20295*                                          |
| HbA | softshell turtle<br>HbA       | <i>Pelodiscus sinensis</i>             | Chinese softshell<br>turtle | ENSPSIG00000011874;<br>ENSPSIG00000011856<br>+RACE |
| HbA | softshell turtle<br>HbK       | <i>Pelodiscus sinensis</i>             | Chinese softshell<br>turtle | ENSPSIG00000012157+<br>RACE                        |
| HbA | softshell turtle<br>HbZ       | <i>Pelodiscus sinensis</i>             | Chinese softshell<br>turtle | ENSPSIG00000012161                                 |
| HbA | cloudy catshark<br>HbA        | <i>Scyliorhinus torazame</i>           | cloudy catshark             | FY415186                                           |
| HbA | spiny dogfish<br>HbA          | <i>Squalus acanthias</i>               | spiny dogfish               | P07408*                                            |
| HbA | zebra finch HbA               | <i>Taeniopygia guttata</i>             | zebra finch                 | DQ216719                                           |
| HbA | zebra finch HbK               | <i>Taeniopygia guttata</i>             | zebra finch                 | DQ213486                                           |
| HbA | African clawed<br>frog HbA1   | <i>Xenopus laevis</i>                  | African clawed frog         | X02796                                             |
| HbA | African clawed<br>frog HbAT5  | <i>Xenopus laevis</i>                  | African clawed frog         | X02798                                             |
| HbA | western clawed<br>frog HbA1   | <i>Xenopus tropicalis</i>              | western clawed frog         | BC088005                                           |
| HbB | painted turtle<br>HbB1        | <i>Chrysemis picta bellii</i>          | western painted<br>turtle   | XM_005290010                                       |
| HbB | painted turtle<br>HbB2        | <i>Chrysemis picta bellii</i>          | western painted<br>turtle   | XM_005290009                                       |
| HbB | painted turtle<br>HbG         | <i>Chrysemis picta bellii</i>          | western painted<br>turtle   | XM_005290008                                       |
| HbB | zebrafish HbBa                | <i>Danio rerio</i>                     | zebrafish                   | BC164283                                           |
| HbB | zebrafish HbBe                | <i>Danio rerio</i>                     | zebrafish                   | NM_198073                                          |
| HbB | chicken HbG                   | <i>Gallus gallus</i>                   | chicken                     | M73995                                             |
| HbB | Port Jackson                  | <i>Heterodontus</i>                    | Port Jackson shark          | P02143*                                            |

|     |                           |                                 |                          |                    |
|-----|---------------------------|---------------------------------|--------------------------|--------------------|
|     | shark HbB                 | <i>portusjacksoni</i>           |                          |                    |
| HbB | human HBB                 | <i>Homo sapiens</i>             | man                      | NM_000518          |
| HbB | human HBD                 | <i>Homo sapiens</i>             | man                      | NM_000519          |
| HbB | human HBE                 | <i>Homo sapiens</i>             | man                      | NM_005330          |
| HbB | human HBG                 | <i>Homo sapiens</i>             | man                      | BC130457           |
| HbB | coelacanth HbB1           | <i>Latimeria chalumnae</i>      | coelacanth               | P23741*            |
| HbB | coelacanth HbB2           | <i>Latimeria chalumnae</i>      | coelacanth               | XM_006011048       |
| HbB | spotless smooth-hound HbB | <i>Mustelus griseus</i>         | spotless smooth-hound    | Q9YGW1*            |
| HbB | platypus HbW              | <i>Ornithorhynchus anatinus</i> | platypus                 | AC203513           |
| HbB | medaka HbB                | <i>Oryzias latipes</i>          | medaka                   | AB080120           |
| HbB | softshell turtle HbB1     | <i>Pelodiscus sinensis</i>      | Chinese softshell turtle | ENSPSIG00000004624 |
| HbB | softshell turtle HbB2     | <i>Pelodiscus sinensis</i>      | Chinese softshell turtle | ENSPSIG00000005077 |
| HbB | cloudy catshark HbB       | <i>Scyliorhinus torazame</i>    | cloudy catshark          | FY415474           |
| HbB | spiny dogfish HbB         | <i>Squalus acanthias</i>        | spiny dogfish            | P07409*            |
| HbB | zebra finch HbE           | <i>Taeniopygia guttata</i>      | zebra finch              | NM_001245112       |
| HbB | western clawed frog HbB1  | <i>Xenopus tropicalis</i>       | western clawed frog      | NM_203528          |
| HbB | western clawed frog HbB2  | <i>Xenopus tropicalis</i>       | western clawed frog      | NM_001016495       |
